# Supplementary material for: Thapsigargin at Non-Cytotoxic Levels Induces a Potent Host Antiviral Response that Blocks Influenza A Virus Replication
Source: PubMed Central journal article supplement (PMC7600819; doi:10.3390/v12101093), 2020-09-27
Supplement: viruses-12-01093-s001.pdf [file viruses-12-01093-s001.pdf]

Supplementary Material

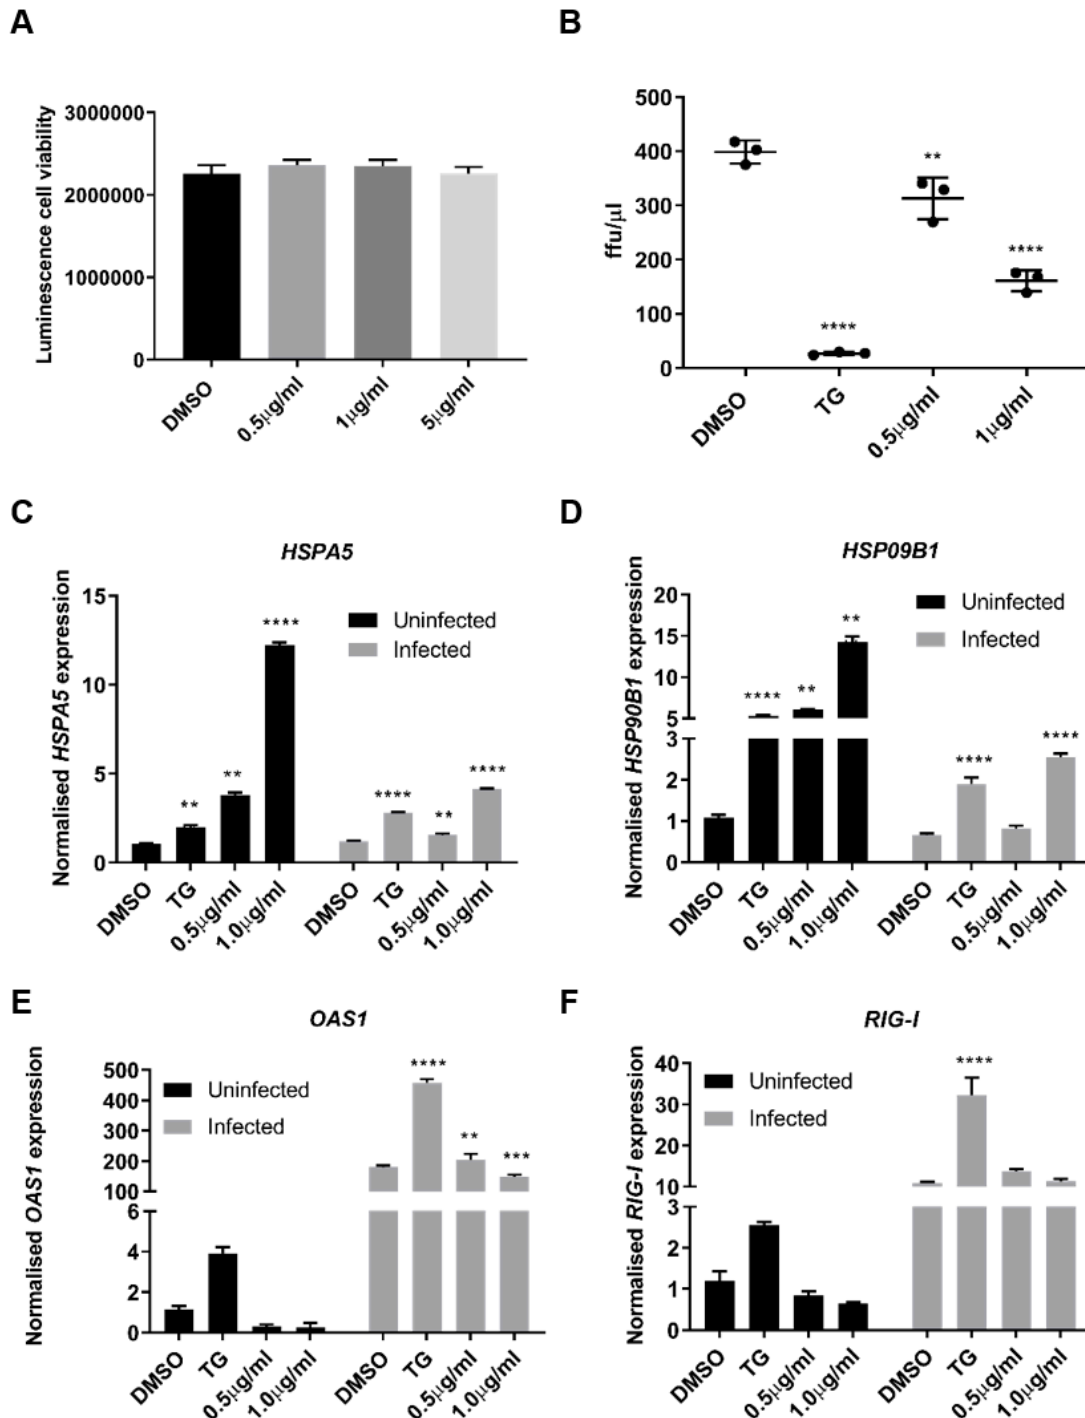

**Figure S1. TG and tunicamycin mediated ER stress.** (A) NPT<sub>r</sub> cells were incubated in indicated concentration of tunicamycin or DMSO control for 30 min and cell viability assay (CellTiter-Glo luminescent cell viability assay) performed 24 h later. Significance determined by one-way ANOVA, relative to DMSO control. (B–F) NPT<sub>r</sub> cells were primed for 30 min with 0.5 μM TG, tunicamycin (0.5 or 1.0 μg/mL) or DMSO, and subsequently infected with USSR H1N1 at 0.5 MOI for 24 h. (B) Spun sns were used in 6 h FFAs on MDCK cells. Significance determined by one-way ANOVA relative to the DMSO control. (C–E) Total RNA was extracted from each sample

to detect expression of ER stress markers (*HSPA5* and *HSP90B1*) and type I IFN associated (*OAS1* and *RIG-I*) genes, normalised to *18S* rRNA. Significance determined by two-way ANOVA, relative to corresponding DMSO control. \* $p < 0.05$  \*\* $p < 0.01$  \*\*\* $p < 0.001$  \*\*\*\* $p < 0.0001$ ).
